# Supplementary material for: Revisiting and updating molecular epidemiology of α-thalassemia mutations in Thailand using MLPA and new multiplex gap-PCR for nine α-thalassemia deletion
Source: Springer Nature journal article supplement (doi:10.1038/s41598-023-36840-8), 2023-06-17

**Supplementary Figure 1** Original agarose gel electrophoresis results of 21  $\alpha$ -thalassemia genotypes (AI-III).

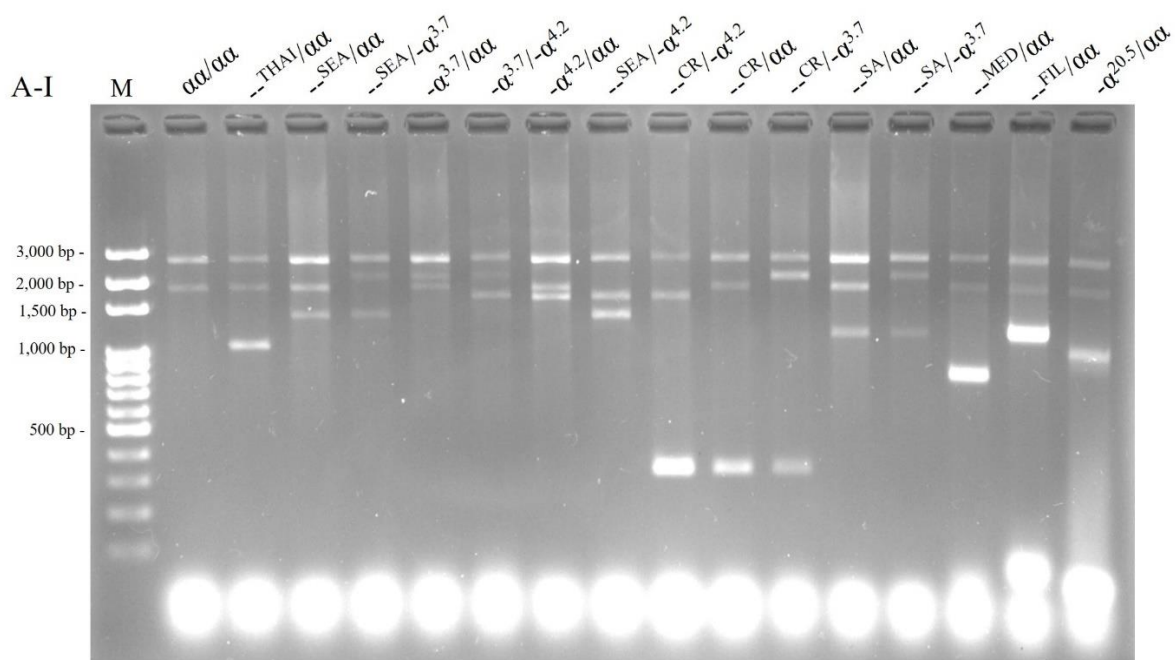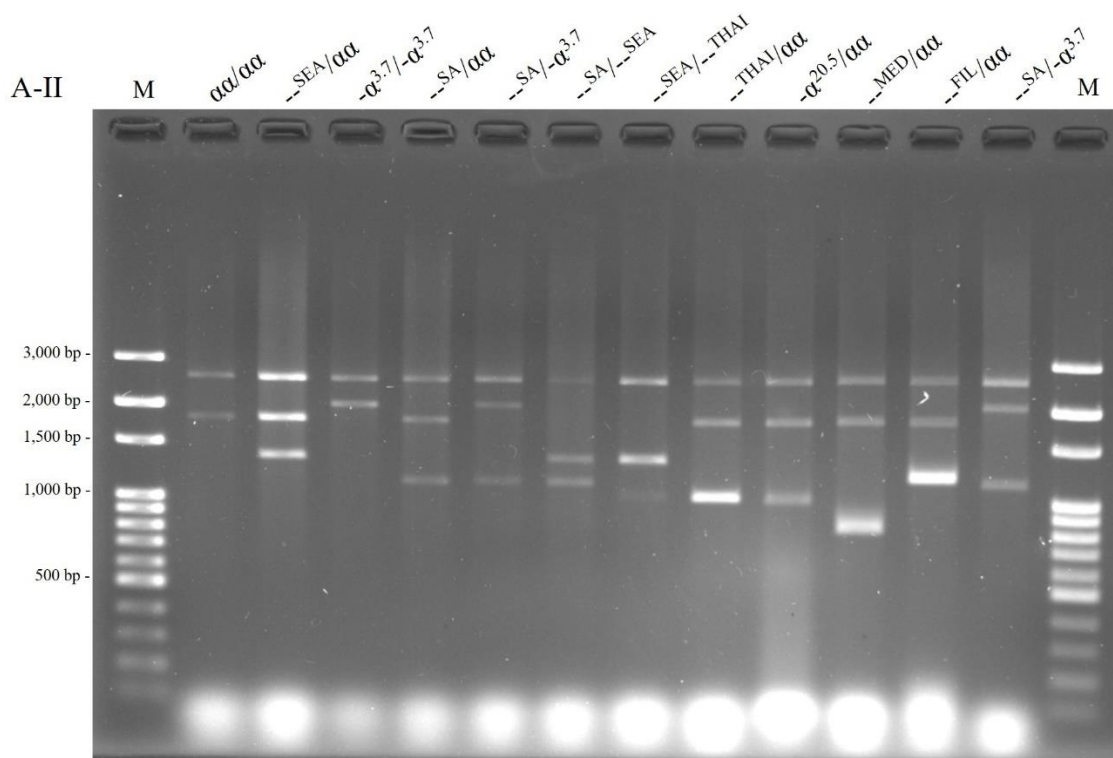

A-III

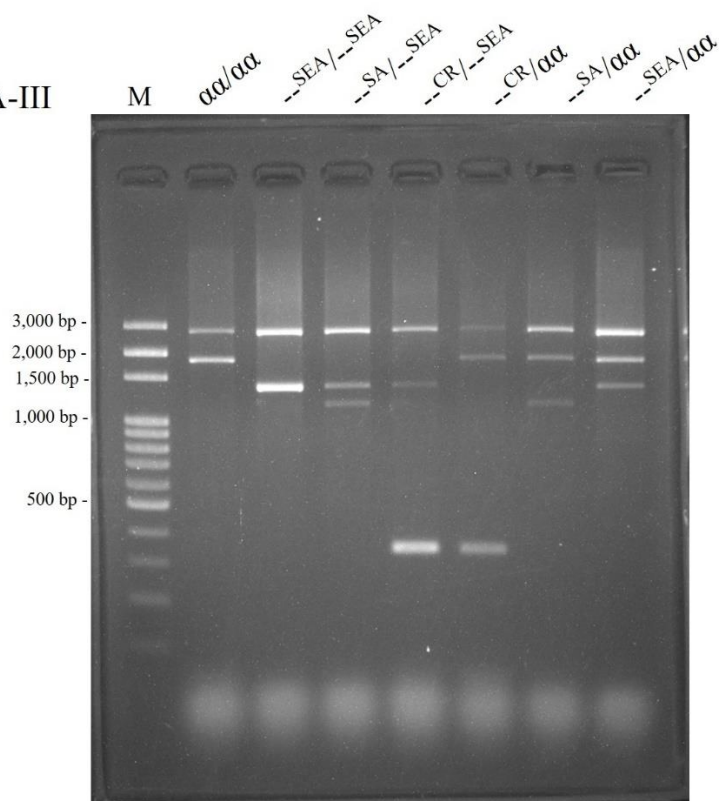

Supplement: MOESM1 [file 41598_2023_36840_MOESM1_ESM.pdf]
